# Supplementary material for: Role for carbohydrate response element-binding protein (ChREBP) in high glucose-mediated repression of long noncoding RNA Tug1
Source: PubMed Central journal article supplement (PMC7681008; doi:10.1074/jbc.ra120.013228), 2020-05-28
Supplement: supp_RA120.013228_159108_2_supp_534182_qwnj61.pdf [file supp_RA120.013228_159108_2_supp_534182_qwnj61.pdf]

**Supporting Table****Oligonucleotide Sequences****PCR cloning primers**

| Gene Name                 | Forward primer (5'-3')         | Reverse primer (5'-3')                   |
|---------------------------|--------------------------------|------------------------------------------|
| Tug1-1kb promoter (mouse) | CAGGTACCAAACACAGCTTGCTATTATGCC | TCCTCGAGCTGCGCCCCAAGAGCTGGAT             |
| Mlx- $\beta$ (mouse)      | tcgaattcACGGAGCCGGGCGCCTCTCC   | ctCTCGAGTCAGTAGAGTTGGTTTTTC              |
| MAX (human)               | tgGAATTCagcgataacgatgacatcgga  | agGTCGACTcagctggcctccatccgga             |
| MXD1 (human)              | tgGAATTCgcggcggcggttcggatgaa   | gtTCTAGAttagagaccaagacacgccttgtgactgtcct |

**qPCR primers**

| Gene Name               | Forward primer (5'-3')   | Reverse primer (5'-3')   |
|-------------------------|--------------------------|--------------------------|
| Gapdh                   | GCCTGGAGAAACCTGCCAA      | CGAAGGTGGAAGAGTGGGAG     |
| Actb                    | CTAAGGCCAACCGTGAAAAG     | ACCAGAGGCATACAGGGACA     |
| Chrebp (Mlxipl) (total) | CACTCAGGGAATACACGCCTAC   | ATCTTGGTCTTAGGGTCTTCAGG  |
| Chrebp- $\alpha$        | CGACACTCACCCACCTCTTC     | TTGTTCAGCCGGATCTTGTC     |
| Chrebp- $\beta$         | TCTGCAGATCGCGTGGAG       | CTTGTCCCGGCATAGCAAC      |
| Morc2a                  | AGGAGCCATTTCTCGAGTCAACCA | ACACCTGCACACCCTGAGAATCTT |
| Tug1-a/b/c              | TCCAAAGTGAACCTACGTCCCG   | TGGGCAGAGTAGGACAGGAG     |
| Tug1-a                  | CGTCTTTCTTCTCGGCCAGA     | CTCCTTCTCCAGAGGAAAGC     |
| Tug1-b                  | CTTCTGACTCCCAGTCCAGT     | ATCATCAACCACCACGGAGA     |
| Tug1-a/c                | CATAGTATCATCTTCGGGTTAC   | CACAAAATGCATGTAGGTTC     |
| Tug1-b/c                | CAAATGTGAGACTGAATGGCCA   | TGCTTAGAGAGCTGTACCACT    |
| Pgcl1 (Ppargcl1)        | TCCTCTTCAAGATCCTGTGTAC   | CACATACAAGGGAGAATTC      |
| GAPDH                   | GGTGGTCTCCTCTGACTTCAACA  | GTGCTGTAGCCAAATTCGTTGT   |
| ACTB                    | CTGTGGCATCCACGAAACTA     | AGGAAAGACACCCACCTTGA     |
| ChREBP (MLXIPL)         | AGTGCTTGAGCCTGGCCTAC     | TTGTTCAGGCGGATCTTGTC     |
| MORC2                   | CCCAAGCAGACCTGAAGAAA     | TTCTGTATCACAGCAGGTAAAG   |
| TUG1                    | AGTGAATTATGTCCTGTGCCT    | GATGGGTGAATGCCTCCTG      |

**ChIP-qPCR primers**

| Name        | Forward primer (5'-3')   | Reverse primer (5'-3')  |
|-------------|--------------------------|-------------------------|
| Tug1        | AGCGCACCTTCGGCCAATCACACA | AATGGCCGAGAGGGGTCCAGGAA |
| Neg control | GTGACCTAGGTTCAGATTC      | GCAGAGTAGAGACCATAGAC    |

**gRNAs targeting Tug1**

| Name                  | sequence (PAM sequence highlighted) | targeting strand/region |
|-----------------------|-------------------------------------|-------------------------|
| ChoRE-gRNA            | GACGTCGCTCGCCAATCAGA <b>AGG</b>     | antisense/ChoRE         |
| non-targeting control | GCGAGGTATTTCGGCTCCGCG <b>NGG</b>    | non-targeting           |

**shRNA for ChREBP knockdown**

| Name                  | target (antisense)  |
|-----------------------|---------------------|
| shChREBP              | TGAAGTTCTTCCACTTGGG |
| non-silencing control | TTACTCTCGCCCAAGCGAG |

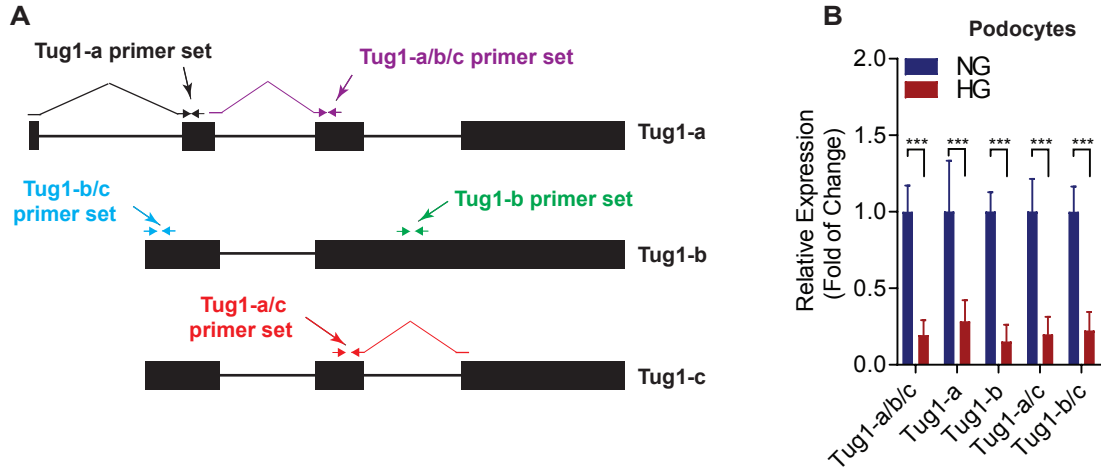

**Supporting Figure 1. Response of *Tug1* isoforms to high glucose milieu in cultured podocytes.** *A*, Three isoforms of the murine *Tug1* transcripts: -a, -b and -c with their corresponding genomic structures. Black boxes represent exons, and lines represent introns. Primer sets to identify different isoform(s) by RT-qPCR are indicated and color-coded. *Tug1*-a forward, *Tug1*-a/b/c forward, and *Tug1*-a/c reverse primers are designed to anneal across the junction of two neighboring exons. *B*, Quantitative analysis of the *Tug1*-isoforms in mouse podocytes cultured under normal glucose (NG, 5mM) or high glucose (HG, 25mM) conditions. Cells were cultured for 48 hrs under NG (5 mM) or HG (25 mM) conditions, RNAs were extracted and analyzed by RT-qPCR ( $n=3$ ). Expression values were normalized to *Gapdh*. Data are presented as mean $\pm$ s.e.m. \*\*\* $p<0.001$ .



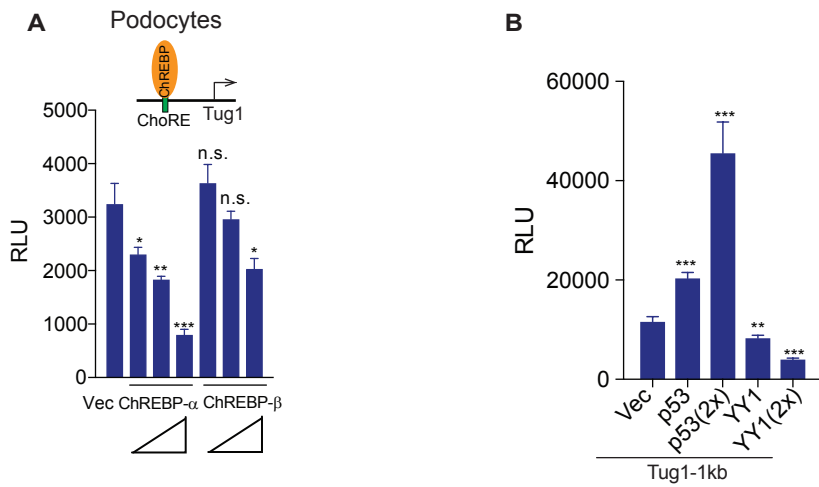

**Supporting Figure 3. Effect of ChREBP- $\beta$ , p53 and YY1 on Tug1 transcription.** A, Luciferase activities in podocytes co-transfected with Tug1-1kb promoter reporter construct (Tug1-1kb) and increasing amounts of ChREBP- $\alpha$  or ChREBP- $\beta$  cDNA expression constructs or empty pcDNA3 vector (Vec) under normal glucose conditions ( $n=3$ ). Luciferase readings are presented as mean $\pm$ s.e.m. *n.s.*, not significant, \*,  $p<0.05$ , \*\*,  $p<0.01$ , \*\*\*,  $p<0.001$  (compared to vector group), B, Cultured mouse podocytes were transfected with Tug1-1kb promoter luciferase construct (Tug1-1kb), together with plasmids for overexpression of indicated transcription factors, or empty pcDNA3 vector (Vec) under normal glucose conditions. Luciferase assays were performed as in A ( $n=3$ ).
